# Supplementary material for: Resident Burnout, Wellness, Professional Development, and Engagement Before and After New Training Schedule Implementation
Source: PubMed Central journal article supplement (PMC10902722; doi:10.1001/jamanetworkopen.2024.0037), 2024-02-28
Supplement: jamanetwopen-e240037-s002.pdf [file jamanetwopen-e240037-s002.pdf]

## Data Sharing Statement

Heppe. Resident Burnout, Wellness, Professional Development, and Engagement Before and After New Training Schedule Implementation. *JAMA Netw Open*. Published February 28, 2024. doi:10.1001/jamanetworkopen.2024.0037

### Data

**Data available:** No
